# Supplementary material for: Herd immunity thresholds for SARS-CoV-2 estimated from unfolding epidemics
Source: bioRxiv or medRxiv preprint supplement (doi:10.1101/2020.07.23.20160762), 2022-08-30
Supplement: Supplementary file [file media-1.pdf]

1 **Supplementary Information for “Herd immunity thresholds**  
2 **for SARS-CoV-2 estimated from unfolding epidemics”:**  
3 **Sensitivity analyses**

4 Ricardo Aguas<sup>1</sup>, Jessica G. King<sup>2</sup>, Guilherme Gonçalves<sup>3</sup>, Marcelo U. Ferreira<sup>4</sup>, M.  
5 Gabriela M. Gomes<sup>5\*</sup>

6 <sup>1</sup> *Centre for Tropical Medicine and Global Health, Nuffield Department of Medicine,*  
7 *University of Oxford, Oxford, United Kingdom.*

8 <sup>2</sup> *Institute of Evolutionary Biology, University of Edinburgh, Edinburgh, United*  
9 *Kingdom.*

10 <sup>3</sup> *Unidade Multidisciplinar de Investigação Biomédica, Instituto de Ciências*  
11 *Biomédicas Abel Salazar, Universidade do Porto, Porto, Portugal.*

12 <sup>4</sup> *Instituto de Ciências Biomédicas, Universidade de São Paulo, São Paulo, Brazil.*

13 <sup>5</sup> *Department of Mathematics and Statistics, University of Strathclyde, Glasgow,*  
14 *United Kingdom.*

15

16

17

18

19 **Contents:**

20 1. Sensitivity to random mixing.

21 **Sensitivity to random mixing**

22 In the main text we assumed random mixing among individuals, but human  
23 connectivity patterns may be assortative due societal structures and human  
24 behaviours. To explore the sensitivity of our results to deviations from random  
25 mixing, we develop an extended formalism that allows individuals to connect  
26 preferentially with those with similar connectivity, formally:

27 
$$\lambda(x) = \frac{\beta \int y h(y - x) [\rho E(y) + I(y)] dy}{N \int y g(y) dy}, \quad (\text{S1})$$

28 where  $h(y - x)$  is a normal distribution on the difference between connectivity  
29 factors (Figure S1).

30 In this case we write the effective reproduction number more generally as the  
31 incidence of new infections divided by the total number of active infections (affected  
32 by  $\rho$  for individuals in  $E$ ) multiplied by the average duration of infection (also  
33 affected by  $\rho$  for individuals in  $E$ )

34 
$$\mathcal{R}_{eff}(t) = \frac{\int \lambda(x, t) x [S(x, t) + \sigma R(x, t)] dx}{\int \rho E(x, t) + I(x, t) dx} \left( \frac{\rho}{\delta} + \frac{1}{\gamma} \right). \quad (\text{S2})$$

35

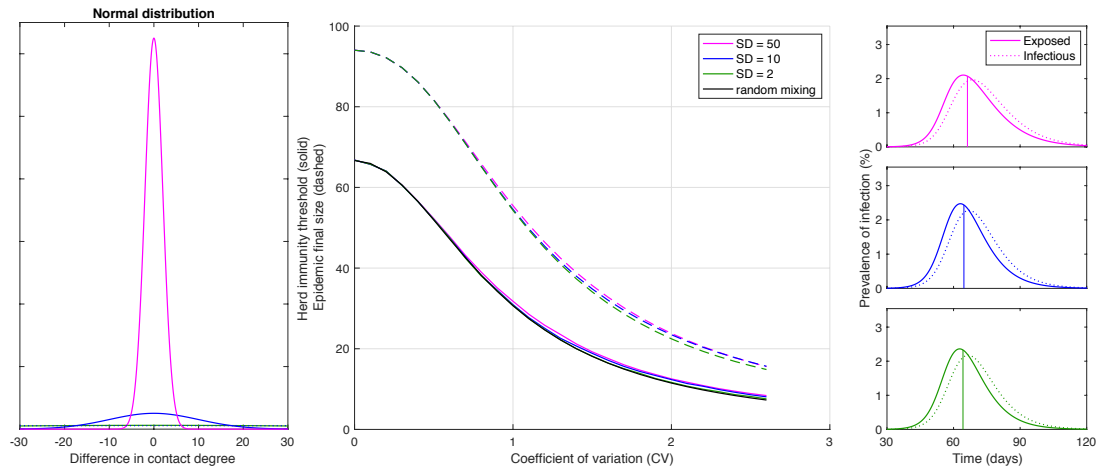

36

37 **Figure S1: Herd immunity threshold and epidemic final size with gamma-**  
 38 **distributed exposure to infection and assortative mixing.** Curves in central panel  
 39 generated with the SEIR model (Equation 1-4) assuming  $R_0 = 3$  and gamma-  
 40 distributed connectivity. Assortative mixing is implemented by imposing a normal  
 41 distribution for contact preferences such that individuals contact preferentially with  
 42 those with the similar contact degree (left). This illustration used normal distributions  
 43 with standard deviation  $SD = 50$  (green);  $SD = 10$  (blue); and  $SD = 2$  (magenta).  
 44 More assortative mixing leads to more skewed epidemics. Herd immunity thresholds  
 45 were calculated numerically as the percentage of the population no longer susceptible  
 46 when new outbreaks are effectively prevented (approximately when the exposed  
 47 fraction crosses the peak in the absence of mitigation). Final sizes of the  
 48 corresponding unmitigated epidemics are also shown. Representative epidemics are  
 49 depicted on the right based on the rightmost CVs represented on the main panel (with  
 50 vertical lines marking the point when herd immunity is achieved).  
 51
